# Supplementary material for: Dysregulation of Epigenetic Control Contributes to Schizophrenia-Like Behavior in Ebp1+/− Mice
Source: PubMed Central journal article supplement (PMC7178112; doi:10.3390/ijms21072609), 2020-04-09
Supplement: ijms-21-02609-s001.pdf [file ijms-21-02609-s001.pdf]

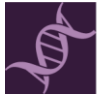

1  
2  
3  
  
4  
5  
6  
7  
8  
9  
10  
11  
12  
13  
14  
15  
16  
17  
18  
19  
20  
21  
22  
23  
24  
25  
26  
27  
28

**Table S1.** List of primers used in qPCR experiments. To compare the mRNA levels, qRT-PCR was used with those primer sets.

| qRT-PCR |         |                                 |        |         |                            |
|---------|---------|---------------------------------|--------|---------|----------------------------|
| Gene    | Primer  | Sequence                        | Gene   | Primer  | Sequence                   |
| Ebp1    | Forward | AGA GCA TTT GAA GAT GAG         | Gad65  | Forward | GGC TCC GGC TTT TGG TCC TT |
|         | Reverse | TCAGTCCCCAGCTTCATT              |        | Reverse | CAG CTT GTT TCC GAT GCC GC |
| Gad67   | Forward | GGT GGA CTG CTC ATG TCC CG      | Slc6a1 | Forward | GTG GCG GGG CCT TCC TAA TC |
|         | Reverse | GAG CAG CAC GCC CAT CAT CT      |        | Reverse | CCA GCT TCC ATA CGC CCA GG |
| Dnmt1   | Forward | ACG GAA ACC CAA GGA AGA GT      | Adcy5  | Forward | TGA CCC CAC AAC AGC AGC AG |
|         | Reverse | TTC CGG TCT TGC TTC TCT GT      |        | Reverse | CTG CCA GGC GGA CTT AGA GC |
| Hdac1   | Forward | CGA GAC GGC ATT GAC GAC GA      | Gabrg2 | Forward | GGT GGA GTA TGG CAC CCT GC |
|         | Reverse | TCC ACA CAC TTG GCG TGT CC      |        | Reverse | CCA GGC TCC TGT TCG GCA AT |
| Gapdh   | Forward | GTG TTC CTA CCC CCA ATG TGT     | Gnai2  | Forward | GAC CAC GGG CAT CGT GGA AA |
|         | Reverse | ATT GTC ATA CCA GGA AAT GAG CTT |        | Reverse | TGA CGC CCT CAA AGC AGT GG |
| Gng3    | Forward | ATT GAG GCC AGC TTG TGC CG      | Gnao1  | Forward | GGA TCG GAT TGG AGC CGG TG |
|         | Reverse | TCT CCC GGA AGG GGT TCT CG      |        | Reverse | CAT AGC CGC TGA GTG CGA CA |

29

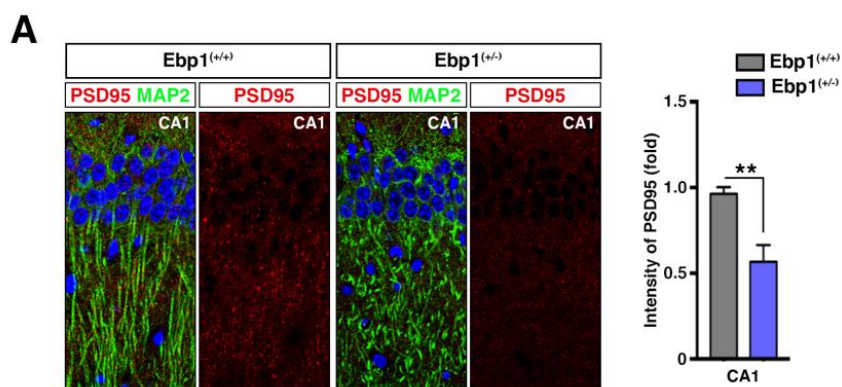

30

31 **Figure S 1.** *Ebp1*<sup>(+/-)</sup> mice displayed impaired neural development in stratum oriens (SO) of CA3/2  
32 region in hippocampus. (A) Isolated mouse brains from *Ebp1*<sup>(+/+)</sup> and *Ebp1*<sup>(+/-)</sup> were frozen, sectioned,  
33 and processed using immunohistochemistry with anti-PSD95 (marker for post-synapse, red) and anti-  
34 MAP2 (marker for dendrite, green) antibodies. Intensity of PSD95 was measured (right). \*\**p* < 0.001.

35

36

37

38

39

40

41

42

43

44

45

46

47

48

49

50

51

52

53

54

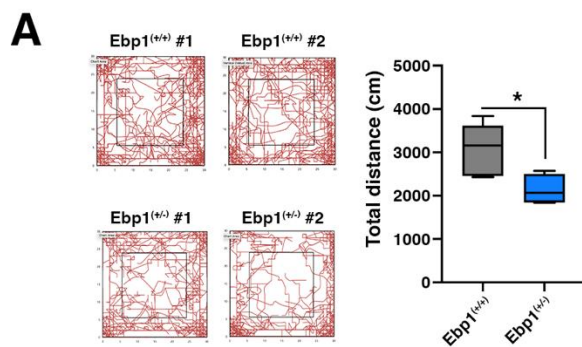

55

56

57

58

**Figure S 2.** *Ebp1*<sup>(+/-)</sup> mice display SZ-like behaviors. (A) Open field test was performed for 20 min with *Ebp1*<sup>(+/+)</sup> and *Ebp1*<sup>(+/-)</sup> mice. Total movement of the mice were recorded and analyzed automatically with Animal Activity Meter: Opto-Varimex-5 Auto-Track (Columbus, USA).
